# Supplementary material for: High thermoelectric performance in Cu2Se superionic conductor with enhanced liquid-like behaviour by dispersing SiC
Source: Royal Society of Chemistry journal article supplement (doi:10.1039/c8ta12210e), 2019-01-01
Supplement: c8ta12210e1.pdf [file c8ta12210e1.pdf]

## Supporting Information:

# High thermoelectric performance in $\text{Cu}_2\text{Se}$ superionic conductor with enhanced liquid-like behaviour by dispersing SiC

Jingdan Lei<sup>a</sup>, Zheng Ma<sup>a</sup>, De Zhang<sup>a</sup>, Yanqun Chen<sup>a</sup>, Chao Wang<sup>\*a</sup>, Xiaoyun Yang<sup>c</sup>, Zhenxiang Cheng<sup>\*a,b</sup>, and Yuanxu Wang<sup>\*a</sup>

<sup>a</sup> Institute for Computational Materials Science, School of Physics and Electronics, Henan University, Kaifeng, 475004, China

<sup>b</sup> Institute for Superconducting and Electronic Materials, University of Wollongong, Squires Way, North Wollongong 2522, Australia

<sup>c</sup> Business School, Zhengzhou Technology and Business University, Zhengzhou, 451400, China

\*Corresponding authors: wangchao@vip.henu.edu.cn; cheng@uow.edu.au; wangyx@henu.edu.cn

## Results and Discussion:

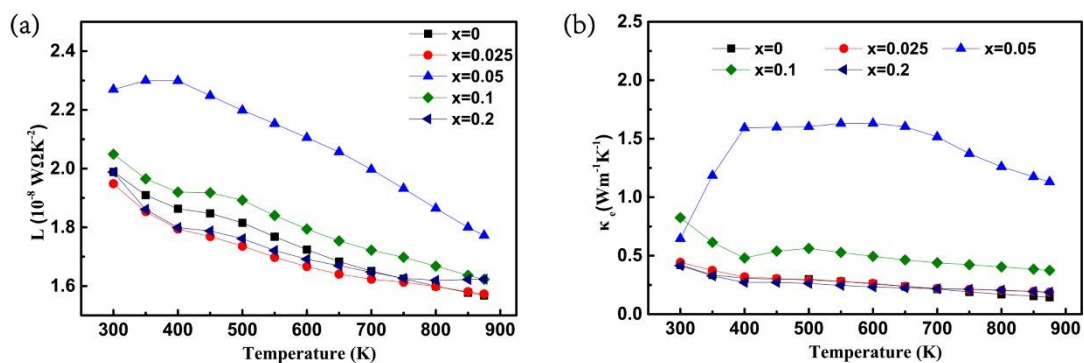

Fig. S1. (a) The temperature dependence of Lorentz number and (b) calculated carrier thermal conductivity for  $\text{Cu}_2\text{Se}/x$  wt% SiC ( $x=0, 0.025, 0.05, 0.1$  and  $0.2$ ) samples.

Fig. S1. shows temperature dependence of Lorentz number and calculated carrier thermal conductivity for  $\text{Cu}_2\text{Se}/x$  wt% SiC ( $x=0, 0.025, 0.05, 0.1$  and  $0.2$ ) samples. Similar phenomenon happened to Zhu et al.'s report <sup>[1]</sup> and  $\text{Cu}_{1.8}\text{S}$  system <sup>[2,3]</sup> and so on.

## References

- [1] Y. B. Zhu, B. P. Zhang and Y. Liu, *Phys. Chem. Chem. Phys.*, 2017, 19, 27664–27669.
- [2] P. Qin, Z.-H. Ge and J. Feng, *J. Alloys Compd.*, 2017, 696, 782–787.
- [3] Z. H. Ge, X. Liu, D. Feng, J. Lin and J. He, *Adv. Energy Mater.*, 2016, 6, 1600607.
